# Supplementary material for: Application of improved Unet network in the recognition and segmentation of lung CT images in patients with pneumoconiosis
Source: Springer Nature journal article supplement (doi:10.1186/s12880-024-01377-3), 2024-08-19
Supplement: 12880_2024_1377_MOESM1_ESM.pdf [file 12880_2024_1377_MOESM1_ESM.pdf]

# Project\_Unet

Please contact the corresponding author for the dataset and weights file.

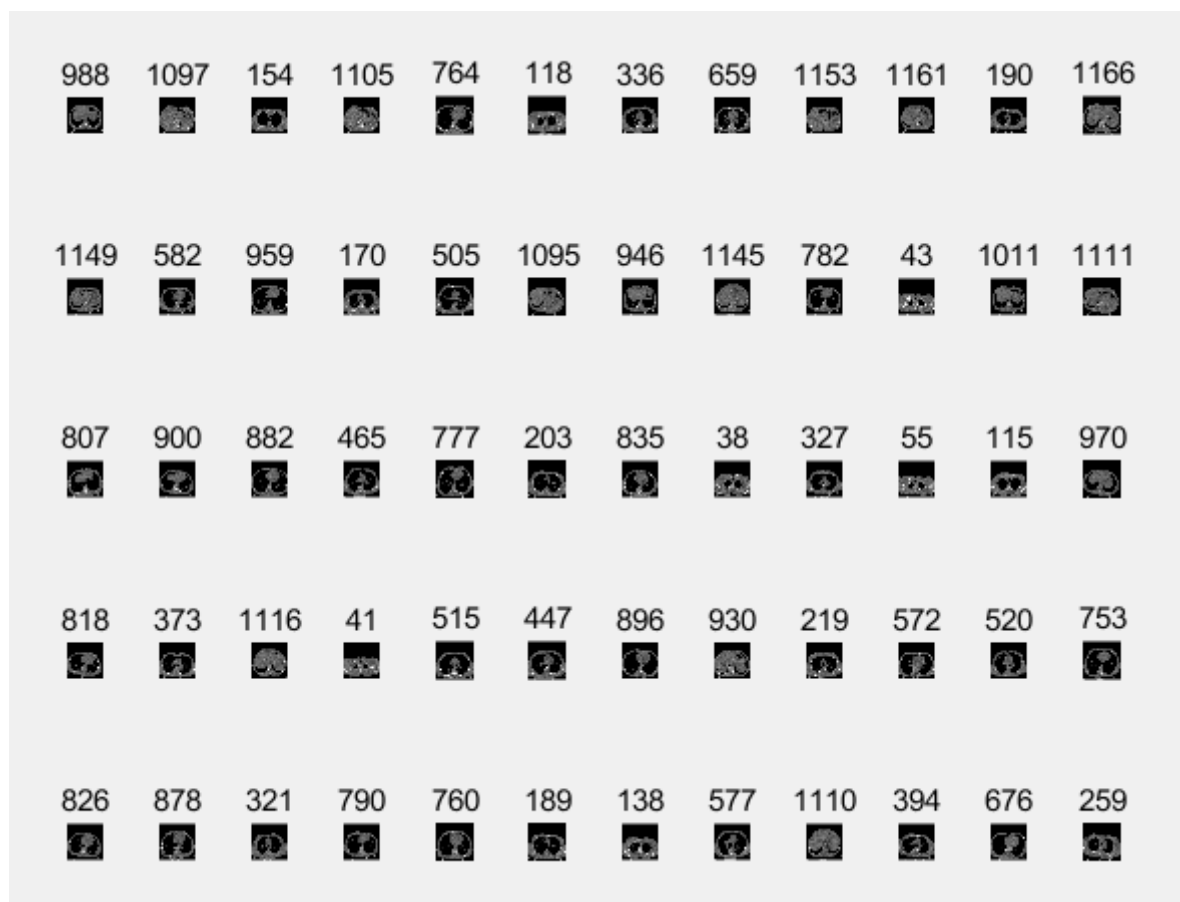

## Basic Environment Configuration

1. Use the "pip install -r requirements.txt" command to install the required files

## Detailed Code Operation Procedure

1. Create a new data file and put the requested dataset in it

|                                                                                           |                 |     |
|-------------------------------------------------------------------------------------------|-----------------|-----|
|  test  | 2023/5/23 11:29 | 文件夹 |
|  train | 2023/5/23 11:29 | 文件夹 |
|  val   | 2023/5/23 11:29 | 文件夹 |

2. Create a new log file to save the metrics from the training process

|                                                                                           |                |         |      |
|-------------------------------------------------------------------------------------------|----------------|---------|------|
|  log.csv | 2023/4/24 2:25 | XLS 工作表 | 7 KB |
|-------------------------------------------------------------------------------------------|----------------|---------|------|

3. Create a new save\_weights file to save the trained weights files

|                                                                                                  |                |        |           |
|--------------------------------------------------------------------------------------------------|----------------|--------|-----------|
|  best_model.pth | 2023/4/24 2:25 | PTH 文件 | 52,933 KB |
|--------------------------------------------------------------------------------------------------|----------------|--------|-----------|

4. The complete project is as follows:

|                                                                                                   |                  |            |      |
|---------------------------------------------------------------------------------------------------|------------------|------------|------|
|  .idea           | 2023/5/23 11:29  | 文件夹        |      |
|  __pycache__     | 2023/7/25 9:41   | 文件夹        |      |
|  data            | 2023/5/23 11:29  | 文件夹        |      |
|  log             | 2024/4/27 14:23  | 文件夹        |      |
|  predictions     | 2023/5/23 11:29  | 文件夹        |      |
|  save_weights    | 2024/4/27 14:23  | 文件夹        |      |
|  src             | 2024/1/3 14:04   | 文件夹        |      |
|  train_utils   | 2023/5/23 11:29  | 文件夹        |      |
|  my_dataset.py | 2022/12/5 15:04  | Python 源文件 | 2 KB |
|  predict.py    | 2022/12/8 22:53  | Python 源文件 | 2 KB |
|  summary.py    | 2024/5/5 16:03   | Python 源文件 | 3 KB |
|  train.py      | 2024/4/27 14:16  | Python 源文件 | 7 KB |
|  transforms.py | 2022/10/20 15:40 | Python 源文件 | 4 KB |

5. Run "train.py" file to train the model and run "predict.py" file to predict the case outcome
